# Supplementary material for: A DLG2 deficiency in mice leads to reduced sociability and increased repetitive behavior accompanied by aberrant synaptic transmission in the dorsal striatum
Source: Mol Autism. 2020 Mar 12;11:19. doi: 10.1186/s13229-020-00324-7 (PMC7069029; doi:10.1186/s13229-020-00324-7)
Supplement: Supplementary file 1 — Additional file 1: Table S1. A full list of detailed information about statistics used for behavioral experiments presented in Figs. 2, 3,4. Table S2. The statistics used for analyses of electrophysiological recording and in situ hybridization quantification. Both tables include the number of animals, variables for comparisons, statistics used, normality test results, and notes regarding identified outliers. Table S3. The measures of locomotion and self-grooming behavior of the heterozygous knockout (Dlg2+/-) mice. Kruskal-Wallis tests were used for multiple comparisons including the heterozygous group. [file 13229_2020_324_MOESM1_ESM.xlsx]

## Sheet: TableS1
Table S1. Statistics used for behavioral experiments
WT, wild-type; KO, knock-out
Figure		Assay Performed	Parameter (Unit)	Comparison			Descriptive Statistics	Statistical Analysis					Normality test p values	Notes
				Variables 1	Variables 2	n	Average ± SEM	Normality	Statistical Test	Significance
2	A	Laboras	Locomotion duration (s)	1	WT	WT = 10 KO = 7	634.2	Not applicable	Repeated measures of two-way ANOVA	Interaction F(71,1065) = 1.494, P = 0.0061 ; ** Genotype F(1, 15) = 2.634, P = 0.1255; ns Time F(71,1065) = 28.39, P < 0.0001; ****		>0.9999; ns	Not applicable	Post-hoc Sidak's multiple comparison test was perforemd under the presence of a significnat interaction effect (Genotype X Time)
					KO		633.4
				2	WT		426.8					0.4863; ns
					KO		546.3
				3	WT		358.6					>0.9999; ns
					KO		395.2
				4	WT		327.8					>0.9999; ns
					KO		393.3
				5	WT		308.6					>0.9999; ns
					KO		247.6
				6	WT		232.9					>0.9999; ns
					KO		200.7
				7	WT		172.2					>0.9999; ns
					KO		105.4
				8	WT		97.27					>0.9999; ns
					KO		128.3
				9	WT		88.5					>0.9999; ns
					KO		73.16
				10	WT		120.1					0.9995; ns
					KO		44.87
				11	WT		191.6					>0.9999; ns
					KO		214.6
				12	WT		246.2					0.699; ns
					KO		356.2
				13	WT		56.9					0.6415; ns
					KO		169.5
				14	WT		46.97					>0.9999; ns
					KO		83.43
				15	WT		30.53					>0.9999; ns
					KO		63.13
				16	WT		31.98					>0.9999; ns
					KO		39.66
				17	WT		37.66					>0.9999; ns
					KO		19.44
				18	WT		18.97					>0.9999; ns
					KO		16.7
				19	WT		25.98					>0.9999; ns
					KO		23.72
				20	WT		12.76					>0.9999; ns
					KO		9.584
				21	WT		20.27					>0.9999; ns
					KO		38.77
				22	WT		22.18					>0.9999; ns
					KO		23
				23	WT		33.8					>0.9999; ns
					KO		10.79
				24	WT		108.6					>0.9999; ns
					KO		161.1
				25	WT		193.8					0.9991; ns
					KO		270.9
				26	WT		207.6					>0.9999; ns
					KO		268.1
				27	WT		221.5					>0.9999; ns
					KO		213.3
				28	WT		179.7					>0.9999; ns
					KO		185.5
				29	WT		101.2					>0.9999; ns
					KO		168.3
				30	WT		115					0.361; ns
					KO		240.6
				31	WT		102.9					0.9954; ns
					KO		185.4
				32	WT		92.73					>0.9999; ns
					KO		80.67
				33	WT		83.9					>0.9999; ns
					KO		54.9
				34	WT		102.9					>0.9999; ns
					KO		168.6
				35	WT		172					>0.9999; ns
					KO		176.3
				36	WT		136.8					0.9946; ns
					KO		219.9
				37	WT		40.68					>0.9999; ns
					KO		108.3
				38	WT		35.33					>0.9999; ns
					KO		46.48
				39	WT		14.64					>0.9999; ns
					KO		22.09
				40	WT		52.44					>0.9999; ns
					KO		45.88
				41	WT		31.89					>0.9999; ns
					KO		11.86
				42	WT		51.35					>0.9999; ns
					KO		32.61
				43	WT		22.8					>0.9999; ns
					KO		59.95
				44	WT		11					>0.9999; ns
					KO		77.85
				45	WT		26.77					>0.9999; ns
					KO		12.54
				46	WT		23.8					>0.9999; ns
					KO		17.26
				47	WT		19.83					>0.9999; ns
					KO		15.7
				48	WT		113.1					>0.9999; ns
					KO		161.8
				49	WT		201.5					>0.9999; ns
					KO		213.4
				50	WT		161.8					>0.9999; ns
					KO		201.7
				51	WT		126.9					0.9582; ns
					KO		219.7
				52	WT		134.6					>0.9999; ns
					KO		156.9
				53	WT		149.6					>0.9999; ns
					KO		112.7
				54	WT		79.43					0.1055; ns
					KO		224.9
				55	WT		99.57					>0.9999; ns
					KO		162.3
				56	WT		64.71					0.9907; ns
					KO		150
				57	WT		88.45					>0.9999; ns
					KO		98.34
				58	WT		63.28					0.0192; *
					KO		230.8
				59	WT		94.36					0.3673; ns
					KO		219.7
				60	WT		78.63					0.7956; ns
					KO		183.9
				61	WT		30.17					>0.9999; ns
					KO		58.31
				62	WT		40.84					>0.9999; ns
					KO		19.18
				63	WT		35.93					>0.9999; ns
					KO		29.51
				64	WT		36.4					>0.9999; ns
					KO		88.93
				65	WT		17.02					>0.9999; ns
					KO		22.66
				66	WT		32.84					>0.9999; ns
					KO		17.03
				67	WT		11.08					>0.9999; ns
					KO		36.33
				68	WT		71.37					>0.9999; ns
					KO		34.87
				69	WT		46.19					>0.9999; ns
					KO		20.55
				70	WT		19.88					>0.9999; ns
					KO		6.081
				71	WT		26.46					>0.9999; ns
					KO		31.04
				72	WT		130.5					0.7264; ns
					KO		239.2
	B	Laboras	Locomotion cumulative duration (s)	Light OFF	WT	WT=10, KO=7	6190 ± 489.4	X	Mann-Whitney U test	U = 17	Two-tailed	0.0878; ns	Yes; P = 0.1096; ns
					KO		7592 ± 662.4						N too small
				Light ON	WT		1444 ± 74.92	X	Mann-Whitney U test	U= 21	Two-tailed	0.1932; ns	Yes; P = 0.8890; ns
					KO		1663 ± 129.1						N too small
	C	Open-field test	Distance moved(m)	10	WT	WT=24, KO=23	4203	Not applicable	Repeated measures of two-way ANOVA	Interaction F(5, 225) = 1.975, P = 0.0833; ns Genotype F(1, 45) = 33.51, P < 0.0001; **** Time F(5, 225) = 59.64, P < 0.0001; ****		<0.0001; ****
					KO		2919
				20	WT		3628					0.0061; **
					KO		2832
				30	WT		3382					0.0028; **
					KO		2533
				40	WT		2947					0.0002; ***
					KO		1936
				50	WT		2688					0.0003; ***
					KO		1708
				60	WT		2518					<0.0001; ****
					KO		1117
	D	Open-field test	Time in center (s)	WT		WT=24, KO=23	310.2 ± 28.07	X	Mann-Whitney U test	U = 85	Two-tailed	P <0.0001; ****	Yes; P = 0.2083; ns
				KO			149.8 ± 45.64						No; P <0.0001; ****
	E	Light-dark test	Time in light (s)	WT		WT=23, KO=21	160.1 ± 19.45	X	Mann-Whitney U test	U = 100	Two-tailed	P = 0.0006;***	Yes; P = 0.3060; ns
				KO			71.33 ± 20.72						No; P = 0.0008; ***	3 exclusions were made prior to analysis (one got injured badly. Two animals did not move around from the starting point - not enough to make choice)
	F	Elevated plus-maze test	Time in arms (s)	WT	closed	WT=24, KO=23	489.8		Two-way ANOVA	Interaction F(1,90) = 3.908, P = 0.0511; ns Arm F(1, 90) = 565.4, P < 0.0001; **** Genotype F(1,90) = 0.4124, P = 0.5224; ns		P < 0.0001; ****
					open		16.83
				KO	closed		441.7					P < 0.0001; ****
					open		41.34
3	A	Three-chamber S1-O	Time spent in sniffing (s)	WT	S1	WT = 22, KO = 22	117.6 ± 9.222	O	Wilcoxon matched-pairs signed rank test	W = 245	Two-tailed	P < 0.0001; ****	Yes; P = 0.5130; ns	For the purpose of comparison between groups, Wilcoxon signed rank test was perforemd for both genotypes despite a normal distribution of data in WT.
					O		38.69 ± 6.362						Yes; P = 0.1393; ns
				KO	S1		129.8 ± 14.00	X	Wilcoxon matched-pairs signed rank test	W = -191.0	Two-tailed	P = 0.0011; **	Yes; P = 0.3258; ns
					O		62.48 ± 10.59						No; P < 0.0001; ****
	B	Three-chamber S1-O	Preference index (%)	WT		WT = 22, KO = 22	55.18 ± 6.537	X	Mann-Whitney U test	U=149	Two-tailed	P = 0.0289; * (P= 0.0469* when the identified outlier excluded)	Yes; P = 0.0661; ns
				KO			33.02 ± 8.532						No: P < 0.0001; ****	One outlier was idenfied according to ROUT method.
	C	Three-chamber S1-S2	Time spent in sniffing (s)	WT	S2	WT = 22, KO = 21	84.10 ± 9.871	X	Wilcoxon matched-pairs signed rank test	W = -143.0	Two-tailed	P = 0.0190; *	Yes; P = 0.8974; ns
					S1		52.15 ± 6.740						No; P = 0.0066; **
				KO	S2		95.32 ± 11.98	X	Wilcoxon matched-pairs signed rank test	W = -119.0	Two-tailed	P = 0.0384; *	Yes; P = 0.0530; ns	One subject in the KO group was excluded from the analysis since it entered neither chamber and remained in the center for a whole session.
					S1		65.78 ± 12.77						No; P < 0.0001; ****
	D	Three-chamber S1-S2	Preference index (%)	WT		WT = 22 KO = 21	18.53 ± 10.08	X	Mann-Whitney U test	U = 216	Two-tailed	P = 0.7224; ns	No; P = 0.0051; **	Two outliers in WT were identified according to ROUT method. Not excluded.
				KO			27.49 ± 7.730						Yes; P = 0.7650; ns
	E	Direct social interaction test	Interaction time (s)	WT		WT = 5 KO = 6	69.22 ± 5.514	X	Mann-Whitney U test	U = 0	Two-tailed	P = 0.0043; **	N too small
				KO			41.92 ± 6.240						N too small
4	A	Laboras	Self-grooming duration (s)	1	WT	WT = 10 KO = 7	350.3		Repeated measures of two-way ANOVA	Interaction F(71, 1065) = 1.683, P = 0.0005 ; *** Genotype F(1, 15) = 7.206, P = 0.0170; * Time F(71, 1067) = 36.21, P < 0.0001; ****		0.9872; ns		Post-hoc Sidak's multiple comparison test was perforemd under the presence of a significnat interaction effect (Genotype X Time)
					KO		619.4
				2	WT		360.1					0.8900; ns
					KO		668.7
				3	WT		360.7					0.0317; *
					KO		861.4
				4	WT		424.9					0.7579; ns
					KO		757.6
				5	WT		430.8					0.0111; *
					KO		970.6
				6	WT		535.4					>0.9999; ns
					KO		684.9
				7	WT		390.7					0.8032; ns
					KO		716.1
				8	WT		272.3					0.1124; ns
					KO		720.9
				9	WT		417.7					0.2202; ns
					KO		834.5
				10	WT		410.7					>0.9999; ns
					KO		468.6
				11	WT		368.7					0.5921; ns
					KO		725
				12	WT		497.3					>0.9999; ns
					KO		676.8
				13	WT		285					0.9897; ns
					KO		551.1
				14	WT		233.4					>0.9999; ns
					KO		442.7
				15	WT		273.9					0.9983; ns
					KO		519
				16	WT		220.8					>0.9999; ns
					KO		254
				17	WT		249.6					>0.9999; ns
					KO		259.6
				18	WT		212.2					0.9919; ns
					KO		475.1
				19	WT		207.2					>0.9999; ns
					KO		366.4
				20	WT		199.2					>0.9999; ns
					KO		266.8
				21	WT		283.8					>0.9999; ns
					KO		413.5
				22	WT		299.5					0.9123; ns
					KO		602.6
				23	WT		363.2					>0.9999; ns
					KO		362.9
				24	WT		540					>0.9999; ns
					KO		664
				25	WT		502.3					0.8070; ns
					KO		827
				26	WT		539.1					0.9072; ns
					KO		843.5
				27	WT		488.2					0.9522; ns
					KO		778.6
				28	WT		449.4					0.5488; ns
					KO		811.6
				29	WT		401.3					0.1812; ns
					KO		827.7
				30	WT		467.4					>0.9999; ns
					KO		671.1
				31	WT		387					0.2965; ns
					KO		788.2
				32	WT		304.3					0.9911; ns
					KO		568.4
				33	WT		471.4					>0.9999; ns
					KO		555
				34	WT		429.1					0.0566; ns
					KO		906.8
				35	WT		407.4					0.2463
					KO		818.5
				36	WT		471.2					>0.9999; ns
					KO		550.8
				37	WT		230.2					>0.9999; ns
					KO		419.9
				38	WT		302.7					0.6296
					KO		653.8
				39	WT		149.4					0.9993
					KO		386.9
				40	WT		314.8					0.9561
					KO		603.7
				41	WT		235.7					>0.9999; ns
					KO		266.7
				42	WT		277.8					>0.9999; ns
					KO		317
				43	WT		286.1					>0.9999; ns
					KO		435.8
				44	WT		180.7					0.9576; ns
					KO		468.9
				45	WT		323.4					>0.9999; ns
					KO		321.8
				46	WT		386.3					>0.9999; ns
					KO		318
				47	WT		352.3					>0.9999; ns
					KO		316.6
				48	WT		657.4					>0.9999; ns
					KO		707.2
				49	WT		427.3					0.3700; ns
					KO		815.8
				50	WT		451.9					0.7539; ns
					KO		785.2
				51	WT		476.7					>0.9999; ns
					KO		646.8
				52	WT		356					0.7563; ns
					KO		688.9
				53	WT		477.2					>0.9999; ns
					KO		674.5
				54	WT		394					>0.9999; ns
					KO		604.4
				55	WT		438.5					>0.9999; ns
					KO		610.7
				56	WT		267.9					0.0206; *
					KO		785.1
				57	WT		429.9					>0.9999; ns
					KO		615.1
				58	WT		375.5					0.9996; ns
					KO		606.6
				59	WT		304.8					0.0432; *
					KO		793.4
				60	WT		500					0.9995; ns
					KO		733.5
				61	WT		189.2					>0.9999; ns
					KO		384.5
				62	WT		386.4					>0.9999; ns
					KO		336.9
				63	WT		179.3					0.3060; ns
					KO		578.7
				64	WT		356.9					>0.9999; ns
					KO		368.3
				65	WT		117.4					0.9990; ns
					KO		358.1
				66	WT		369.6					0.9993; ns
					KO		606.6
				67	WT		144.3					>0.9999; ns
					KO		337.4
				68	WT		376.5					>0.9999; ns
					KO		420.4
				69	WT		490.5					>0.9999; ns
					KO		616.5
				70	WT		416.8					>0.9999; ns
					KO		440.5
				71	WT		569					>0.9999; ns
					KO		585.2
				72	WT		581.8					0.9996; ns
					KO		813.7
	B	Laboras	Self-grooming bouts	1	WT	WT = 10 KO = 7	41.4		Repeated measures of two-way ANOVA	Interaction F(71, 1065) = 1.886, P < 0.0001; **** Genotype F(1, 15) = 12.08, P = 0.0034; ** Time F(71, 1065) = 48.25, P < 0.0001; ****		0.5235; ns		Post-hoc Sidak's multiple comparison test was perforemd under the presence of a significnat interaction effect (Genotype X Time)
					KO		80.71
				2	WT		53.9					0.9143; ns
					KO		86.43
				3	WT		39.9					0.0012; **
					KO		106
				4	WT		47.8					0.7985; ns
					KO		82.86
				5	WT		48					0.0718; ns
					KO		98.29
				6	WT		35.4					0.1275; ns
					KO		83
				7	WT		28.1					0.0467; *
					KO		80.29
				8	WT		25.3					0.3034; ns
					KO		68.29
				9	WT		25.1					0.0018; **
					KO		89.86
				10	WT		36					>0.9999; ns
					KO		42.57
				11	WT		38.1					0.3620; ns
					KO		80
				12	WT		41.5					0.7385; ns
					KO		77.57
				13	WT		22.4					0.1605; ns
					KO		68.86
				14	WT		12.7					0.3718; ns
					KO		54.43
				15	WT		13.9					0.9482; ns
					KO		45.29
				16	WT		17.1					>0.9999; ns
					KO		29.43
				17	WT		8.7					>0.9999; ns
					KO		23.43
				18	WT		17.2					>0.9999; ns
					KO		37.29
				19	WT		9.4					0.9897; ns
					KO		38
				20	WT		9.2					>0.9999; ns
					KO		19.57
				21	WT		18.8					>0.9999; ns
					KO		35.71
				22	WT		14.4					0.9677; ns
					KO		44.86
				23	WT		15.2					>0.9999; ns
					KO		32.29
				24	WT		33.8					0.7823; ns
					KO		69.14
				25	WT		46.7					0.0425; *
					KO		99.29
				26	WT		55					0.6217; ns
					KO		92.86
				27	WT		51.9					0.6534; ns
					KO		89.29
				28	WT		45.5					0.1592; ns
					KO		92
				29	WT		36.3					0.3902; ns
					KO		77.71
				30	WT		36.6					0.3342; ns
					KO		79
				31	WT		41.9					0.0748; ns
					KO		92
				32	WT		18.4					0.0785; ns
					KO		68.29
				33	WT		20.9					0.6818; ns
					KO		57.86
				34	WT		37.4					0.7756; ns
					KO		72.86
				35	WT		36.9					0.2565; ns
					KO		80.86
				36	WT		35.5					0.8286; ns
					KO		70
				37	WT		18.7					0.7508; ns
					KO		54.57
				38	WT		26.6					0.5083; ns
					KO		66.14
				39	WT		7.7					0.9908; ns
					KO		36.14
				40	WT		24.4					>0.9999; ns
					KO		48.14
				41	WT		12.5					>0.9999; ns
					KO		28.57
				42	WT		18.2					>0.9999; ns
					KO		24
				43	WT		13.8					>0.9999; ns
					KO		31
				44	WT		11.3					0.9866; ns
					KO		40.29
				45	WT		17.5					>0.9999; ns
					KO		30.43
				46	WT		25.3					>0.9999; ns
					KO		25.14
				47	WT		18.5					>0.9999; ns
					KO		31
				48	WT		42.9					>0.9999; ns
					KO		48.71
				49	WT		56.7					0.8907; ns
					KO		89.86
				50	WT		45.3					0.8919; ns
					KO		78.43
				51	WT		40					0.9899; ns
					KO		68.57
				52	WT		32.6					0.6995; ns
					KO		69.29
				53	WT		33.3					0.5073; ns
					KO		72.86
				54	WT		25.1					0.5512; ns
					KO		64
				55	WT		38.3					0.9543; ns
					KO		69.43
				56	WT		15.8					<0.0001; ****
					KO		97.29
				57	WT		27.1					0.6284; ns
					KO		64.86
				58	WT		25.7					0.4681; ns
					KO		65.86
				59	WT		28.5					0.0031; **
					KO		91.29
				60	WT		20.1					<0.0001; ****
					KO		97.71
				61	WT		17.2					0.4186; ns
					KO		58.14
				62	WT		28.6					>0.9999; ns
					KO		30.71
				63	WT		16.7					0.1953; ns
					KO		62.14
				64	WT		22.9					>0.9999; ns
					KO		42.71
				65	WT		9.8					0.9816; ns
					KO		39.29
				66	WT		15.2					>0.9999; ns
					KO		34.29
				67	WT		8.2					0.9288; ns
					KO		40.29
				68	WT		14.5					0.9993; ns
					KO		40
				69	WT		24.1					0.9998; ns
					KO		48.29
				70	WT		23.2					0.9777; ns
					KO		53
				71	WT		25.5					0.9913; ns
					KO		53.86
				72	WT		36.6					0.5368; ns
					KO		75.71
	C	Laboras	Self-grooming duration (s)	Light OFF	WT	WT = 10 KO = 7	14592 ± 1129	X	Mann-Whitney U test	U = 4	Two-tailed	P = 0.0012; **	Yes; P = 0.9448; ns
					KO		26201 ± 2690						N too small
				Light ON	WT		10731 ± 908.5	X	Mann-Whitney U test	U = 11	Two-tailed	P = 0.0185; *	Yes; P = 0.1530; ns
					KO		16362 ± 1830						N too small
			Total grooming duration / 72 hrs	WT			25323 ± 1870	X	Mann-Whitney U test	U = 3	Two-tailed	P = 0.0007; ***	Yes; P = 0.2047; ns
				KO			42563 ± 4189						N too small
	D	Laboras	Self-grooming duration (s)	Light OFF	WT	WT = 10 KO = 7	1301 ± 250.8	X	Mann-Whitney U test	U = 2	Two-tailed	P = 0.0004; ***	Yes; P = 0.2755; ns
					KO		2774 ± 185.4						N too small
				Light ON	WT		728.3 ±206.6	X	Mann-Whitney U test	U = 13	Two-tailed	P = 0.0330; *	Yes; P = 0.2534; ns
					KO		1412 ± 174.6						N too small
			Total grooming bouts / 72 hrs	WT			2029 ± 430.1	X	Mann-Whitney U test	U = 4	Two-tailed	P = 0.0012; **	Yes; P = 0.0972; ns
				KO			4185 ± 340.9						N too small
	E	Self-grooming measures	Self-grooming duration (s)	WT		WT = 11 KO = 12	28.06 ± 10.77	X	Mann-Whitney U test	U = 28	Two-tailed	P = 0.0188; *	No; P = 0.0003; ***
				KO			115.7 ± 37.56						No; P = 0.0010; **

## Sheet: TableS2
Table S2. Statitics used for electrophysiological and in situ hybridization experiments
Figure		Meausures	Parameter (Unit)	Comparison			Descriptive Statistics	Statistical Analysis					Normality test p values
				Variables: Genotype		n (animals)	MEAN ± SEM	Normality	Statistical Test	Significance
5	E	Dorsolateral striatum sEPSCs	Frequency (Hz)	WT		WT = 15 (3) KO = 12 (3)	3.168 ± 0.4255	O	Student's t-test	t(25) = 2.928	Two-tailed	P = 0.0072; **	Yes; P = 0.1302; ns
				KO			1.729 ± 0.1317						Yes; P = 0.6258; ns
			Amplitude (pA)	WT			17.88 ± 0.6239	O	Student's t-test	t(25) = 0.3597	Two-tailed	P = 0.7221; ns	Yes; P = 0.7601; ns
				KO			18.27 ± 0.9215						Yes; P = 0.5712; ns
	F	Dorsolateral striatum sIPSCs	Frequency (Hz)	WT		WT = 17 (3) KO = 13 (3)	3.573 ± 0.3221	O	Student's t-test	t(28) = 0.5910	Two-tailed	P = 0.5593; ns	Yes; P = 0.7425; ns
				KO			3.313 ± 0.2705						Yes; P = 0.5862; ns
			Amplitude (pA)	WT			40.69 ± 1.959	O	Student's t-test	t(28) = 0.5218	Two-tailed	P = 0.6059; ns	Yes; P = 0.8011; ns
				KO			39.26 ± 1.811						Yes; P = 0.7366; ns
S1	B	In situ hybridization	Expression level	Cortex	E18	N = 15 (2)	85.17 ± 5.757	O	One-way ANOVA Sidak's multiple comparisons	F(5, 84) = 20.65, P < 0.0001; ****	t(84) = 6.980	P < 0.0001; ****	Yes; P = 0.2657; ns
					P0		90.29 ± 6.517	O			t(84) = 7.854	P < 0.0001; ****	Yes; P = 0.4730; ns
					P7		96.15 ±2.926	O			t(84) = 8.854	P < 0.0001; ****	Yes; P = 0.9338; ns
					P14		69.28 ± 1.981	O			t(84) = 4.271	P = 0.0003; ***	Yes; P = 0.8737; ns
					P21		70.83 ±3.366	O			t(84) = 4.534	P < 0.0001; ****	Yes; P = 0.3338; ns
					P56		44.24 ± 1.922	O			control	control	Yes; P = 0.0988; ns
			Expression level	Striatum	E18	N = 15 (2)	67.34 ± 3.499	O	Kruskal-Wallis test Dunn's multiple comparisons	P < 0.0001; ****	Z = 5.703	P < 0.0001; ****	Yes; P = 0.4376, ns
					P0		80.30 ± 5.040	O			Z = 6.737	P < 0.0001; ****	Yes; P = 0.6144; ns
					P7		71.52 ±3.756	X			Z = 6.010	P < 0.0001; ****	No; P < 0.0001; ****
					P14		39.81 ± 1.842	O			Z = 2.278	P = 0.1136; ns	Yes; P = 0.1714; ns
					P21		41.31 ± 1.939	O			Z = 2.523	P = 0.0582; ns	Yes; P = 0.5771; ns
					P56		24.83 ±1.098	O			control	control	Yes; P = 0.3800; ns
			Expression level	Cerebellum	E18	N = 15 (2)	54.03 ± 3.629	O	Kruskal-Wallis test Dunn's multiple comparisons	P < 0.0001; ****	Z = 3.131	P = 0.0087; **	Yes; P = 0.9855; ns
					P0		63.77 ± 4.297	O			Z = 4.284	P < 0.0001; ****	Yes; P = 0.4564; ns
					P7		79.04 ± 6.508	O			Z = 5.549	P < 0.0001; ****	Yes; P = 0.6145; ns
					P14		45.32 ± 3.538	O			Z = 1.873	P = 0.3054; ns	Yes; P = 0.2315; ns
					P21		46.63 ± 3.236	O			Z = 1.957	P = 0.2519; ns	Yes; P = 0.3558; ns
					P56		32.21 ± 3.906	X			control	control	No; P = 0.0330; *

## Sheet: TableS3
Table S3. Measures of locomotion and self-grooming behavior of the heterozygous Dlg2+/- mice
	Locomotion duration (s)			Self-grooming duration (s)			Self-grooming bouts
	WT (n=10)	HT (n=15)	KO (n=7)	WT (n=10)	HT (n=15)	KO (n=7)	WT (n=10)	HT (n=15)	KO (n=7)
Light OFF	6190±489.4	6556±468.5	7592±662.4	14592±1129	19490±784.3 *	26201±2690 ***	1301±250.8	1031±248.4	2774±185.4 *
Light ON	1444±74.92	1383±93.38	1663±129.1	10731±908.5	12600±703.3	16362±1830 *	728.3±206.6	456.7±155.3	1412±174.6
Total	7633±496.6	7939±525.9	9255±725.7	25323±1870	32090±1275 *	42563±4189 ***	2029±430.1	1488±392.2	4185±340.9 *
Note that the data of WT and KO from Table S1 are shown here for comparisons. Kruskal-Wallis test was used. *p < 0.05, ***p<0.001 vs. WT.
WT, wild-type; HT, heterozygous knockout (Dlg2+/-); KO, homozygoud knockout (Dlg2-/-)
